# Supplementary material for: Metabolomic characterization and temporal dynamics of Burkholderia cepacia for polyhydroxyalkanoates production from oleic acid
Source: Metabolomics. 2026 Jun 16;22(4):95. doi: 10.1007/s11306-026-02473-x (PMC13272603; doi:10.1007/s11306-026-02473-x)
Supplement: Supplementary file 1 — Supplementary Material 1 [file 11306_2026_2473_MOESM1_ESM.xlsx]

## Sheet: pathway_results
pathway_id	pathway_name	Total	Hits	Impact	Pvalue	-Log10(Pvalue)	FDR	compounds	Compound_name	links
bma00220	Arginine biosynthesis	18	6	0.27398	0.00037822	3.4223	0.035553	C00437; C00077; C00064; C15532; C00025; C00624	N-acetyl-L-ornithine; L-ornithine; L-glutamine; L-glutamate; N-acetyl-L-glutamate; N-acetyl-L-citrulline	https://www.genome.jp/kegg-bin/show_pathway?bma00220+C00437+C00077+C00064+C15532+C00025+C00624
bma00071	Fatty acid degradation	39	8	0.33205	0.001464	2.8345	0.068806	C00249; C00024; C00136; C00527; C01832; C05274; C05270; C01944	Hexadecanoate; Butanoyl-CoA; Glutaryl-CoA; Acetyl-CoA; Dodecanoyl-CoA; Decanoyl-CoA; Hexanoyl-CoA; Octanoyl-CoA	https://www.genome.jp/kegg-bin/show_pathway?bma00071+C00249+C00024+C00136+C00527+C01832+C05274+C05270+C01944
bma00630	Glyoxylate and dicarboxylate metabolism	32	6	0.21134	0.0094807	2.0232	0.26689	C00149; C00025; C00024; C01127; C03459; C00064	Acetyl-CoA; Malate; L-Glutamate; 4-Hydroxy-2-oxoglutarate; 2-Hydroxy-3-oxosuccinate; L-Glutamine	https://www.genome.jp/kegg-bin/show_pathway?bma00630+C00149+C00025+C00024+C01127+C03459+C00064
bma00400	Phenylalanine, tyrosine and tryptophan biosynthesis	24	5	0.21631	0.011357	1.9447	0.26689	C00074; C00279; C00493; C03175; C00079	L-Phenylalanine; Shikimate 3-phosphate; Shikimate; Phosphoenolpyruvate; D-Erythrose 4-phosphate	https://www.genome.jp/kegg-bin/show_pathway?bma00400+C00074+C00279+C00493+C03175+C00079
bma00230	Purine metabolism	72	9	0.10282	0.022822	1.6416	0.30062	C00064; C00020; C00212; C00147; C00262; C00385; C00242; C00387; C00366	L-Glutamine; AMP; Adenosine; Adenine; Hypoxanthine; Xanthine; Guanine; Guanosine; Urate	https://www.genome.jp/kegg-bin/show_pathway?bma00230+C00064+C00020+C00212+C00147+C00262+C00385+C00242+C00387+C00366
bma00270	Cysteine and methionine metabolism	39	6	0.41277	0.024511	1.6106	0.30062	C00263; C00021; C00073; C01137; C00170; C03089	5'-Methylthioadenosine; S-Adenosylmethioninamine; L-Methionine; S-Adenosyl-L-homocysteine; L-Homoserine; 5-Methylthio-D-ribose	https://www.genome.jp/kegg-bin/show_pathway?bma00270+C00263+C00021+C00073+C01137+C00170+C03089
bma00020	Tricarboxylic acid cycle (TCA)	20	4	0.14569	0.027081	1.5673	0.30062	C05379; C00149; C00074; C00024	Oxalosuccinate; Malate; Phosphoenolpyruvate; Acetyl-CoA	https://www.genome.jp/kegg-bin/show_pathway?bma00020+C05379+C00149+C00074+C00024
bma00380	Tryptophan metabolism	21	4	0.45834	0.031981	1.4951	0.30062	C02693; C02700; C00024; C00527	L-Formylkynurenine; Glutaryl-CoA; (Indol-3-yl)acetamide; Acetyl-CoA	https://www.genome.jp/kegg-bin/show_pathway?bma00380+C02693+C02700+C00024+C00527
bma00240	Pyrimidine metabolism	44	6	0.15324	0.041907	1.3777	0.33884	C00475; C00112; C00705; C00106; C00299; C00064	L-Glutamine; Uracil; CDP; Cytidine; dCDP; Uridine	https://www.genome.jp/kegg-bin/show_pathway?bma00240+C00475+C00112+C00705+C00106+C00299+C00064
bma00030	Pentose phosphate pathway	23	5	0.25561	0.043256	1.364	0.33884	C00257; C00279; C04442; C00121; C05382	D-gluconate; D-erythrose 4-phosphate; 2-dehydro-3-deoxy-D-gluconate 6-phosphate; D-ribose; D-sedoheptulose 7-phosphate	https://www.genome.jp/kegg-bin/show_pathway?bma00030+C00257+C00279+C04442+C00121+C05382
bma00710	Carbon fixation in photosynthetic organisms	17	4	0.11293	0.015232	1.8172	0.28636	C0007; C00149; C00279; C05382	Phosphoenolpyruvate; (S)-Malate; D-Erythrose 4-phosphate; Sedoheptulose 7-phosphate	https://www.kegg.jp/kegg-bin/show_pathway?bma00710+C0007+C00149+C00279+C05382	Without biological sense.
bma00998	Biosynthesis of various antibiotics	5	2	0	0.031138	1.5067	0.30062	C00074; C03167	Phosphoenolpyruvate; Phosphonoacetaldehyde	https://www.kegg.jp/kegg-bin/show_pathway?bma00998+C00074+C03167	Without biological sense.
bma00310	Lysine degradation	20	3	0.36364	0.11159	0.95236	0.8069	C00527; C00024; C00431	Glutaryl-CoA; Acetyl-CoA; 5-Aminopentanoate	https://www.kegg.jp/kegg-bin/show_pathway?bma00310+C00527+C00024+C00431
bma00410	beta-Alanine metabolism	11	2	0	0.13602	0.8664	0.84054	C0566; C00024	3-Hydroxypropionyl-CoA; Acetyl-CoA	https://www.kegg.jp/kegg-bin/show_pathway?bma00410+C0566+C00024
bma00440	Phosphonate and phosphinate metabolism	11	2	0.33333	0.13602	0.8664	0.84054	C00074; C03167	Phosphoenolpyruvate; Phosphonoacetaldehyde	https://www.kegg.jp/kegg-bin/show_pathway?bma00440+C00074+C03167
bma00620	Pyruvate metabolism	24	3	0.26111	0.16775	0.77533	0.84054	C00074; C00149; C00024	Phosphoenolpyruvate; (S)-Malate; Acetyl-CoA	https://www.kegg.jp/kegg-bin/show_pathway?bma00620+C00074+C00149+C00024
bma00332	Carbapenem biosynthesis	3	1	0	0.16849	0.77344	0.84054	C00025	L-Glutamate	https://www.kegg.jp/kegg-bin/show_pathway?bma00332+C00025
bma01040	Biosynthesis of unsaturated fatty acids	3	1	0	0.16849	0.77344	0.84054	C00249	Hexadecanoic acid	https://www.kegg.jp/kegg-bin/show_pathway?bma01040+C00249
bma00910	Nitrogen metabolism	13	2	0	0.17891	0.74737	0.84054	C00064; C00025;	L-Glutamine; L-Glutamate	https://www.kegg.jp/kegg-bin/show_pathway?bma00910+C00064+C00025
bma00470	D-Amino acid metabolism	26	3	0.10714	0.19845	0.70235	0.84054	C00041; C00025; C0021	L-Alanine; L-Glutamate; D-Glutamate	https://www.kegg.jp/kegg-bin/show_pathway?bma00470+C00041+C00025+C0021
bma00680	Methane metabolism	26	3	0.12083	0.19845	0.70235	0.84054	C00074; C00024; C00149	Phosphoenolpyruvate; Acetyl-CoA; (S)-Malate	https://www.kegg.jp/kegg-bin/show_pathway?bma00680+C00074+C00024+C00149
bma00640	Propanoate metabolism	26	3	0.36503	0.19845	0.70235	0.84054	C0010; C00024; C0566	Propanoyl-CoA; Acetyl-CoA; 3-Hydroxypropionyl-CoA	https://www.kegg.jp/kegg-bin/show_pathway?bma00640+C0010+C00024+C0566
bma00996	Biosynthesis of various alkaloids	4	1	0	0.21817	0.6612	0.84054	C00024	Acetyl-CoA	https://www.kegg.jp/kegg-bin/show_pathway?bma00996+C00024
bma00999	Biosynthesis of various plant secondary metabolites	4	1	0	0.21817	0.6612	0.84054	C00073	L-Methionine	https://www.kegg.jp/kegg-bin/show_pathway?bma00999+C00073
bma00300	Lysine biosynthesis	15	2	0.14	0.22355	0.65063	0.84054	C00263; C03972	L-Homoserine; 2,3,4,5-Tetrahydrodipicolinate	https://www.kegg.jp/kegg-bin/show_pathway?bma00300+C00263+C03972
bma00250	Alanine, aspartate and glutamate metabolism	18	2	0.59091	0.29174	0.53501	1	C00025; C00064	L-Glutamate; L-Glutamine	https://www.kegg.jp/kegg-bin/show_pathway?bma00250+C00025+C00064
bma00340	Histidine metabolism	19	2	0.05469	0.31442	0.50249	1	C02739; C00025	1-(5-Phospho-D-ribosyl)-ATP; L-Glutamate	https://www.kegg.jp/kegg-bin/show_pathway?bma00340+C02739+C00025
bma00330	Arginine and proline metabolism	35	3	0.15	0.3473	0.4593	1	C0113; C00148; C00025	S-Adenosylmethioninamine; L-Proline; L-Glutamate	https://www.kegg.jp/kegg-bin/show_pathway?bma00330+C0113+C00148+C00025
bma00430	Taurine and hypotaurine metabolism	7	1	0	0.35033	0.45552	1	C00024	Acetyl-CoA	https://www.kegg.jp/kegg-bin/show_pathway?bma00430+C00024
bma00650	Butanoate metabolism	21	2	0	0.35928	0.44456	1	C00024; C00136	Acetyl-CoA; Butanoyl-CoA	https://www.kegg.jp/kegg-bin/show_pathway?bma00650+C00024+C00136
bma00280	Valine, leucine and isoleucine degradation	36	3	0.00932	0.36414	0.43873	1	C00024; C05998; C00100	Acetyl-CoA; 3-Hydroxyisovaleryl-CoA; Propanoyl-CoA	https://www.kegg.jp/kegg-bin/show_pathway?bma00280+C00024+C05998+C00100
bma00362	Benzoate degradation	22	2	0.05073	0.38135	0.41868	1	C00527; C00024	Glutaryl-CoA; Acetyl-CoA	https://www.kegg.jp/kegg-bin/show_pathway?bma00362+C00527+C00024
bma00785	Lipoic acid metabolism	24	2	0	0.42449	0.37213	1	C00024; C00527	Acetyl-CoA; Glutaryl-CoA	https://www.kegg.jp/kegg-bin/show_pathway?bma00785+C00024+C00527
bma00010	Glycolysis / Gluconeogenesis	24	2	0.14176	0.42449	0.37213	1	C00024; C00074	Acetyl-CoA; Phosphoenolpyruvate	https://www.kegg.jp/kegg-bin/show_pathway?bma00010+C00024+C00074
bma00360	Phenylalanine metabolism	24	2	0.24832	0.42449	0.37213	1	C00079; C00024	L-Phenylalanine; Acetyl-CoA	https://www.kegg.jp/kegg-bin/show_pathway?bma00360+C00079+C00024
bma00051	Fructose and mannose metabolism	27	2	0.06808	0.48622	0.31316	1	C00392; C00095	Mannitol; D-Fructose	https://www.kegg.jp/kegg-bin/show_pathway?bma00051+C00392+C00095
bma00750	Vitamin B6 metabolism	11	1	0.18182	0.49287	0.30727	1	C00250	Pyridoxal	https://www.kegg.jp/kegg-bin/show_pathway?bma00750+C00250
bma00261	Monobactam biosynthesis	12	1	0	0.52339	0.28118	1	C03972	2,3,4,5-Tetrahydrodipicolinate	https://www.kegg.jp/kegg-bin/show_pathway?bma00261+C03972
bma00052	Galactose metabolism	13	1	0.2	0.55209	0.25799	1	C00880	D-Galactonate	https://www.kegg.jp/kegg-bin/show_pathway?bma00052+C00880
bma00450	Selenocompound metabolism	15	1	0	0.60449	0.21861	1	C00041	L-Alanine	https://www.kegg.jp/kegg-bin/show_pathway?bma00450+C00041
bma00760	Nicotinate and nicotinamide metabolism	15	1	0	0.60449	0.21861	1	C00153	Nicotinamide	https://www.kegg.jp/kegg-bin/show_pathway?bma00760+C00153
bma00562	Inositol phosphate metabolism	16	1	0	0.62838	0.20178	1	C00024	Acetyl-CoA	https://www.kegg.jp/kegg-bin/show_pathway?bma00562+C00024
bma00740	Riboflavin metabolism	16	1	0	0.62838	0.20178	1	C04732	5-Amino-6-(1-D-ribitylamino)uracil	https://www.kegg.jp/kegg-bin/show_pathway?bma00740+C04732
bma00540	Lipopolysaccharide biosynthesis	35	2	0.02389	0.62964	0.2009	1	C00043	Sedoheptulose 7-phosphate; UDP-N-acetyl-alpha-D-glucosamine	https://www.kegg.jp/kegg-bin/show_pathway?bma00540+C00043
bma00520	Amino sugar and nucleotide sugar metabolism	35	2	0.06732	0.62964	0.2009	1	C00043; C00095	UDP-N-acetyl-alpha-D-glucosamine; D-Fructose	https://www.kegg.jp/kegg-bin/show_pathway?bma00520+C00043+C00095
bma00500	Starch and sucrose metabolism	17	1	0	0.65084	0.18653	1	C00095	D-Fructose	https://www.kegg.jp/kegg-bin/show_pathway?bma00500+C00095
bma00541	O-Antigen nucleotide sugar biosynthesis	18	1	0	0.67196	0.17265	1	C00043	UDP-N-acetyl-alpha-D-glucosamine	https://www.kegg.jp/kegg-bin/show_pathway?bma00541+C00043
bma00550	Peptidoglycan biosynthesis	18	1	0	0.67196	0.17265	1	C00043	UDP-N-acetyl-alpha-D-glucosamine	https://www.kegg.jp/kegg-bin/show_pathway?bma00550+C00043
bma00564	Glycerophospholipid metabolism	19	1	0.06911	0.69183	0.16	1	C01233	sn-Glycero-3-phosphoethanolamine	https://www.kegg.jp/kegg-bin/show_pathway?bma00564+C01233
bma00730	Thiamine metabolism	20	1	0	0.7105	0.14843	1	C01279	4-Amino-5-hydroxymethyl-2-methylpyrimidine	https://www.kegg.jp/kegg-bin/show_pathway?bma00730+C01279
bma00900	Terpenoid backbone biosynthesis	20	1	0	0.7105	0.14843	1	C00024	Acetyl-CoA	https://www.kegg.jp/kegg-bin/show_pathway?bma00900+C00024
bma00920	Sulfur metabolism	20	1	0	0.7105	0.14843	1	C00263	L-Homoserine	https://www.kegg.jp/kegg-bin/show_pathway?bma00920+C00263
bma00480	Glutathione metabolism	20	1	0.02984	0.7105	0.14843	1	C00025	L-Glutamate	https://www.kegg.jp/kegg-bin/show_pathway?bma00480+C00025
bma00040	Pentose and glucuronate interconversions	22	1	0	0.74457	0.12809	1	C01904	D-Arabitol	https://www.kegg.jp/kegg-bin/show_pathway?bma00040+C01904
bma00061	Fatty acid biosynthesis	45	2	0.00086	0.76352	0.11718	1	C00024; C00249	Acetyl-CoA; Hexadecanoic acid	https://www.kegg.jp/kegg-bin/show_pathway?bma00061+C00024+C00249
bma00260	Glycine, serine and threonine metabolism	34	1	0.05513	0.88009	0.055474	1	C00263	L-Homoserine	https://www.kegg.jp/kegg-bin/show_pathway?bma00260+C00263
bma00790	Folate biosynthesis	37	1	0.0008	0.90087	0.045337	1	C00272	Tetrahydrobiopterin	https://www.kegg.jp/kegg-bin/show_pathway?bma00790+C00272
bma00860	Porphyrin metabolism	57	1	0	0.97252	0.012102	1	C00025	L-Glutamate	https://www.kegg.jp/kegg-bin/show_pathway?bma00860+C00025
