# Supplementary material for: Metabolomic characterization and temporal dynamics of Burkholderia cepacia for polyhydroxyalkanoates production from oleic acid
Source: Metabolomics. 2026 Jun 16;22(4):95. doi: 10.1007/s11306-026-02473-x (PMC13272603; doi:10.1007/s11306-026-02473-x)
Supplement: Supplementary file 3 — Supplementary Material 3 [file 11306_2026_2473_MOESM3_ESM.xlsx]

## Sheet: Identified Metabolites
Compound Name	Molecular Formula	Molecular Weight	RT (min)	mz Error (ppm)	Analytical platform	DET	ID Level	Adduct	CVQC	PVALOR	VIP	Fisher's LSD
Nicotinamide	C6H6N2O	122.13	12.638	-	GC-QTOF-MS	EI	2	-	26.2795	0.00019331	1.5669	G2 - G1; G3 - G1; G4 - G1; G4 - G2; G4 - G3
Uracil	C4H4N2O2	112.09	15.74	-	GC-QTOF-MS	EI	2	-	18.1287	#N/A	1.1261	#N/A
Octanedioic acid	C8H12O4	172.18	15.194	-	GC-QTOF-MS	EI	2	-	17.0101	0.0092453	1.2498	G1 - G4; G2 - G3; G2 - G4
Tagatose/Fructose/Sorbose	C6H12O6	180.16	16.706	-	GC-QTOF-MS	EI	2	-	14.1423	7.7813e-06	1.7278	G2 - G1; G3 - G1; G4 - G1; G4 - G2; G4 - G3
Ribose	C5H10O5	150.13	14.884	-	GC-QTOF-MS	EI	2	-	13.5124	5.26e-06	1.7304	G2 - G1; G3 - G1; G4 - G1; G4 - G2; G4 - G3
Heptanedioic acid	C7H10O4	158.15	14.009	-	GC-QTOF-MS	EI	2	-	12.5255	2.7862e-06	1.7736	G3 - G1; G4 - G1; G3 - G2; G4 - G2; G4 - G3
Diglycerol	C6H14O5	166.17	15.738	-	GC-QTOF-MS	EI	2	-	11.3508	3.7213e-07	1.8328	G2 - G1; G3 - G1; G4 - G1; G4 - G2; G4 - G3
Linoleic acid	C18H31O2	279.44	20.235	-	GC-QTOF-MS	EI	2	-	10.4856	#N/A	1.1265	#N/A
Glucopyranuronate	C6H9O7	193.13	17.333	-	GC-QTOF-MS	EI	2	-	10.203	4.6381e-08	1.8626	G2 - G1; G3 - G1; G4 - G1; G3 - G2; G4 - G2; G4 - G3
Cytidine	C9H13N3O5	243.22	22.401	-	GC-QTOF-MS	EI	2	-	9.74318	4.9406e-05	1.6822	G2 - G1; G3 - G1; G4 - G1; G3 - G2; G4 - G2
Glutamate	C5H8NO4	146.12	13.271	-	GC-QTOF-MS	EI	2	-	9.73768	0.0058825	1.0894	G2 - G1; G3 - G1; G4 - G1
Alanine	C3H7NO2	89.094	7.452	-	GC-QTOF-MS	EI	2	-	8.81223	0.0089725	0.94779	G2 - G1; G3 - G1; G4 - G1
Acetyl-glutamate	C7H9NO5	187.15	12.833	-	GC-QTOF-MS	EI	2	-	8.5741	0.0024134	1.2013	G2 - G1; G3 - G1; G4 - G1
Malic acid	C4H4O5	132.07	12.575	-	GC-QTOF-MS	EI	2	-	7.9052	0.013409	0.91968	G2 - G1; G3 - G1; G4 - G1
Ribitol/Xylitol/Arabitol	C5H12O5	152.15	15.2	-	GC-QTOF-MS	EI	2	-	7.84934	0.012733	0.85215	G1 - G2; G1 - G3; G1 - G4
Adenosine	C10H13N5O4	267.24	23.54	-	GC-QTOF-MS	EI	2	-	7.65343	2.9555e-07	1.8498	G3 - G1; G4 - G1; G3 - G2; G4 - G2; G4 - G3
FA(20:3)	C20H34O2	306.48	21.72	-	GC-QTOF-MS	EI	2	-	7.61023	8.2276e-08	1.815	G2 - G1; G3 - G1; G4 - G1; G4 - G2; G4 - G3
Dodecanoic acid	C12H23O2	199.31	14.62	-	GC-QTOF-MS	EI	2	-	6.6689	0.009032	1.1034	G1 - G4; G2 - G3; G2 - G4
Oleic acid	C18H33O2	281.46	19.223	-	GC-QTOF-MS	EI	2	-	5.77862	2.242e-07	1.8585	G2 - G1; G3 - G1; G4 - G1; G3 - G2; G4 - G2; G4 - G3
Galactonate	C6H11O7	195.15	18.197	-	GC-QTOF-MS	EI	2	-	5.50494	0.0034461	1.449	G3 - G1; G4 - G1; G4 - G2
Decanoic acid	C10H19O2	171.26	12.301	-	GC-QTOF-MS	EI	2	-	5.27042	2.0594e-08	1.8913	G2 - G1; G3 - G1; G4 - G1; G3 - G2; G4 - G2; G4 - G3
Oxo-ureidopropanoate	C4H5N2O4	145.09	11.827	-	GC-QTOF-MS	EI	2	-	5.0057	0.0027881	1.1553	G2 - G1; G3 - G1; G4 - G1
Homoserine	C4H9NO3	119.12	11.067	-	GC-QTOF-MS	EI	2	-	4.98206	5.4751e-08	1.8681	G2 - G1; G3 - G1; G4 - G1; G4 - G2; G4 - G3
Conduritol-epoxide	C6H10O5	162.14	17.333	-	GC-QTOF-MS	EI	2	-	4.37568	2.5122e-08	1.9027	G3 - G1; G4 - G1; G3 - G2; G4 - G2; G4 - G3
Isoleucine	C6H13NO2	131.17	8.513	-	GC-QTOF-MS	EI	2	-	4.03493	0.00032559	1.5915	G2 - G1; G3 - G1; G4 - G1; G4 - G2
Hexanoic acid	C6H11O2	115.15	6.942	-	GC-QTOF-MS	EI	2	-	3.70043	4.2708e-06	1.7367	G1 - G2; G1 - G3; G1 - G4; G2 - G4; G3 - G4
Sylvic acid	C20H29O2	301.45	22.143	-	GC-QTOF-MS	EI	2	-	3.33871	6.6041e-08	1.8563	G2 - G1; G3 - G1; G4 - G1; G4 - G2; G4 - G3
Pentadecanal	C15H30O	226.23	19.47	2	LC-QTOF-MS	ESI-	3	[M-H]-	2.67404	0.0045775	1.3721	G1 - G2; G1 - G3; G1 - G4
Palmitic acid (hexadecanoic acid)	C16H32O2	256.24	21.01	1	LC-QTOF-MS	ESI-	2	[M-H]-	7.79187	3.5832e-07	1.9863	G1 - G2; G1 - G3; G1 - G4; G2 - G4
Linoleate (linoleic acid)	C18H32O2	280.24	20.43	5	LC-QTOF-MS	ESI-	2	[M-H]-	1.81716	0.0040453	1.6246	G1 - G3; G1 - G4; G2 - G4
Pentadecenal	C15H28O	224.214	18.13	3	LC-QTOF-MS	ESI-	3	[M+HCOOH-H]-	3.47948	0.00012958	1.801	G3 - G1; G4 - G1; G4 - G2; G4 - G3
Acetylornithine	C7H14N2O3	174.1	15.15	2	LC-QTOF-MS	ESI-	3	[M-H]-	3.3134	2.319e-05	1.9493	G3 - G1; G4 - G1; G4 - G2; G4 - G3
FA(20:3)	C20H34O3	322.251	19.12	2	LC-QTOF-MS	ESI-	3	[M-H]-	4.46342	0.00023216	1.7776	G3 - G1; G4 - G1; G4 - G2; G4 - G3
Butylfuranoctanoic acid	C16H26O3	266.188	16.85	7	LC-QTOF-MS	ESI-	3	[M-H]-	2.06542	0.00037992	1.7481	G3 - G1; G4 - G1; G4 - G2; G4 - G3
FA(16:2)	C16H28O3	268.204	17.61	1	LC-QTOF-MS	ESI-	3	[M-H]-	4.42931	3.336e-05	1.8872	G3 - G1; G4 - G1; G4 - G2; G4 - G3
Hydroxymyristate	C14H28O3	244.204	20.43	0	LC-QTOF-MS	ESI-	3	[M-H]-	8.33908	1.4515e-06	1.8595	G4 - G1; G4 - G2; G4 - G3
Ornithine	C5H12N2O2	132.09	15.15	2	LC-QTOF-MS	ESI-	3	[M-H]-	2.21268	2.3989e-05	1.9476	G3 - G1; G4 - G1; G4 - G2; G4 - G3
Oxooctadecadienoate (Oxo-ODE)	C18H30O3	294.219	17.83	3	LC-QTOF-MS	ESI-	2	[M-H]-	4.49566	2.1258e-05	1.8795	G3 - G1; G4 - G1; G4 - G2; G4 - G3
Tetradecenoate (C14:1)	C14H26O2	226.193	18.7	4	LC-QTOF-MS	ESI-	3	[M-H]-	2.26532	4.2627e-08	2.133	G2 - G1; G3 - G1; G4 - G1; G3 - G2; G4 - G2; G4 - G3
Menthyl acetoacetate	C14H24O3	240.173	16.16	4	LC-QTOF-MS	ESI-	3	[M-H]-	3.44184	0.00021996	1.7481	G2 - G1; G3 - G1; G4 - G1; G4 - G2; G4 - G3
Shikimate-phosphate	C7H11O8P	254.019	0.61	8	LC-QTOF-MS	ESI-	4	[M-H]-	3.04259	5.0398e-07	2.0636	G2 - G1; G3 - G1; G4 - G1; G4 - G2; G4 - G3
Dodecenal	C13H24O	196.183	16.16	5	LC-QTOF-MS	ESI-	3	[M-H-H2O]-	5.43665	7.3273e-05	1.8189	G2 - G1; G3 - G1; G4 - G1; G4 - G2; G4 - G3
Gluconic acid	C6H12O7	196.058	0.66	2	LC-QTOF-MS	ESI-	2	[M-H]-	6.33406	1.6714e-08	2.1663	G2 - G1; G3 - G1; G4 - G1; G4 - G2; G4 - G3
FA(19:1)	C19H36O2	296.272	17.8	3	LC-QTOF-MS	ESI-	3	[M-H]-	2.67803	2.7746e-16	2.3307	G2 - G1; G3 - G1; G4 - G1; G3 - G2; G4 - G2; G4 - G3
Heptadecenoate	C17H32O2	268.24	16.54	4	LC-QTOF-MS	ESI-	3	[M-H]-	4.01097	0.0083044	1.2662	G2 - G1; G3 - G1; G4 - G1
Oxomyristate	C14H26O3	242.188	16.31	1	LC-QTOF-MS	ESI-	3	[M-H]-	5.90017	0.0012534	1.293	G2 - G1; G3 - G1; G4 - G1
Heptadecatrien-diyn-diol	C17H22O2	258.162	16.48	1	LC-QTOF-MS	ESI-	3	[M-H]-	2.0027	0.0041246	1.2179	G2 - G1; G3 - G1; G4 - G1
FA(20:5)	C20H30O3	318.219	17.4	3	LC-QTOF-MS	ESI-	3	[M-H]-	7.04468	0.0022885	1.2709	G2 - G1; G3 - G1; G4 - G1
Hydroxyretinoic acid	C20H28O3	316.204	16.21	2	LC-QTOF-MS	ESI-	2	[M-H]-	4.39098	0.0095154	1.1501	G2 - G1; G3 - G1; G4 - G1
Pyrrolnitrin	C10H6Cl2N2O2	255.981	15.68	0	LC-QTOF-MS	ESI-	2	[M-H]-	3.88397	2.5267e-06	2.0521	G2 - G1; G3 - G1; G4 - G1; G4 - G2; G4 - G3
Adenosylmethioninamine	C14H23N6O3S	355.436	19.92	8	LC-QTOF-MS	ESI-	4	[M-H]-	8.61084	0.00011619	1.5768	G1 - G2; G1 - G3; G1 - G4
FA(24:5)	C24H38O2	358.287	14	8	LC-QTOF-MS	ESI-	3	[M-H]-	2.40803	0.00020962	1.7975	G3 - G1; G4 - G1; G4 - G2; G4 - G3
FA(26:5)	C26H42O2	386.318	20.27	6	LC-QTOF-MS	ESI-	3	[M-H-H2O]-	13.1588	3.3837e-06	2.0168	G3 - G1; G4 - G1; G3 - G2; G4 - G2; G4 - G3
CDP	C9H15N3O11P2	403.177	17.46	18	LC-QTOF-MS	ESI-	4	[M-H-H2O]-	4.34366	3.3025e-08	2.1567	G2 - G1; G3 - G1; G4 - G1; G3 - G2; G4 - G2; G4 - G3
FA(21:1)	C21H40O3	340.298	20.43	6	LC-QTOF-MS	ESI-	4	[M+HCOOH-H]-	10.5855	1.9929e-05	1.9461	G3 - G1; G4 - G1; G4 - G2; G4 - G3
Deoxycytidine-diphosphate	C9H15N3O10P2	387.177	18.4	15	LC-QTOF-MS	ESI-	4	[M-H]-	13.4698	6.9595e-07	2.0675	G3 - G1; G4 - G1; G3 - G2; G4 - G2; G4 - G3
Adenosine-monophosphate	C10H14N5O7P	347.063	17.44	4	LC-QTOF-MS	ESI-	4	[M+HCOOH-H]-	4.2113	4.2975e-07	2.0595	G2 - G1; G3 - G1; G4 - G1; G4 - G2; G4 - G3
Acetyl-hydroxylysine	C8H16N2O4	204.111	14	7	LC-QTOF-MS	ESI-	4	[2M-H]-	19.0472	2.3424e-06	1.8243	G1 - G2; G1 - G3; G1 - G4
Ribosylpyrimidine	C9H13N2O4	213.088	14.3	2	LC-QTOF-MS	ESI-	4	[2M-H]-	15.3337	6.5997e-07	1.8778	G1 - G2; G1 - G3; G1 - G4
FA(14:5)	C14H18O2	218.131	17.58	4	LC-QTOF-MS	ESI-	3	[2M-H]-	6.82261	0.003729	1.5977	G3 - G1; G4 - G1; G4 - G2
PC(10:1) / PE(15:1)	C20H40NO7P	437.254	15.19	4	LC-QTOF-MS	ESI-	3	[M-H]-	3.3362	4.775e-11	2.2498	G2 - G1; G3 - G1; G4 - G1; G3 - G2; G4 - G2; G4 - G3
PE(16:1)	C21H42NO7P	451.27	15.95	4	LC-QTOF-MS	ESI-	2	[M-H]-	3.26726	9.3245e-08	1.7587	G1 - G2; G1 - G3; G1 - G4
Eicosapentaenoyl Serotonin	C30H40N2O2	460.309	19.07	7	LC-QTOF-MS	ESI-	3	[M-H]-	11.5411	7.2039e-05	1.9056	G2 - G1; G3 - G1; G4 - G1; G4 - G2; G4 - G3
PE(17:2) / PC(12:0) / PS(16:0)	C22H42NO7P/C22H44NO8P	463.27	16.16	3	LC-QTOF-MS	ESI-	3	[M-H]-/ [M-H-H2O]-	4.93138	9.3882e-09	1.5771	G2 - G1; G3 - G1; G4 - G1
PE(17:1)	C22H44NO7P	465.286	16.43	4	LC-QTOF-MS	ESI-	2	[M-H]-	1.49744	1.0686e-12	1.9564	G2 - G1; G3 - G1; G4 - G1; G4 - G2
FA(27:2)	C27H50O3	422.376	22.79	5	LC-QTOF-MS	ESI-	3	[M+HCOOH-H]-	6.33081	0.00065581	1.772	G3 - G1; G4 - G1; G4 - G2
PE(18:2)	C23H44NO7P	477.286	16.96	3	LC-QTOF-MS	ESI-	2	[M-H]-	3.43399	0.0019145	1.4947	G1 - G2; G1 - G3; G1 - G4
LPG(16:1)	C22H43O9P	482.264	16.04	5	LC-QTOF-MS	ESI-	2	[M-H]-	4.10959	4.1468e-05	1.4646	G1 - G2; G1 - G3; G1 - G4
PE(19:1)	C24H48NO7P	493.317	17.8	4	LC-QTOF-MS	ESI-	2	[M-H]-	2.40102	1.5863e-15	2.3316	G2 - G1; G3 - G1; G4 - G1; G3 - G2; G4 - G2; G4 - G3
PG(17:2)	C23H43O9P	494.264	16.26	3	LC-QTOF-MS	ESI-	4	[M-H]-	6.57056	0.0063731	1.3865	G2 - G1; G3 - G1; G4 - G1
PG(18:1)	C24H47O9P	510.296	17.49	5	LC-QTOF-MS	ESI-	2	[M-H]-	2.01555	0.00037794	1.5592	G1 - G2; G1 - G3; G1 - G4
PG(15:1)	C21H41O9P	468.249	15.2	5	LC-QTOF-MS	ESI-	3	[M+HCOOH-H]-	1.57015	2.4707e-10	2.2337	G2 - G1; G3 - G1; G4 - G1; G3 - G2; G4 - G2; G4 - G3
PG(19:1)	C25H49O9P	524.311	18.15	4	LC-QTOF-MS	ESI-	2	[M-H]-	1.07356	2.7247e-06	2.0147	G2 - G1; G3 - G1; G4 - G1; G4 - G2; G4 - G3
PC(20:5)	C28H48NO7P	541.317	7.7	8	LC-QTOF-MS	ESI-	3	[M-H]-	3.28737	0.00096118	1.7573	G3 - G1; G4 - G1; G4 - G2
PC(18:4)	C26H46NO7P	515.301	17.79	1	LC-QTOF-MS	ESI-	3	[M+Cl]-	7.86936	1.8845e-07	2.1122	G2 - G1; G3 - G1; G4 - G1; G3 - G2; G4 - G2
PI(16:0)	C25H49O12P	572.296	7.48	3	LC-QTOF-MS	ESI-	3	[M-H-H2O]-	4.49866	0.00071087	1.6446	G2 - G1; G3 - G1; G4 - G1
FAHFA(18:4)	C33H56O4	516.418	17.95	0	LC-QTOF-MS	ESI-	3	[M+HCOOH-H]-	9.45457	4.6124e-05	1.7785	G4 - G1; G4 - G2; G4 - G3
FAHFA(24:4)	C38H66O4	586.496	20.27	4	LC-QTOF-MS	ESI-	3	[M-H-H2O]-	11.973	6.0993e-06	1.9863	G3 - G1; G4 - G1; G3 - G2; G4 - G2; G4 - G3
IC202B	C23H44N6O8	532.322	8.6	9	LC-QTOF-MS	ESI-	3	[M+HCOOH-H]-	3.94386	0.011005	1.4853	G3 - G1; G4 - G1
PC(16:1)	C26H50NO8P	535.327	17.08	5	LC-QTOF-MS	ESI-	3	[M+HCOOH-H]-	5.33183	8.8941e-05	1.5873	G1 - G2; G1 - G3; G1 - G4
FAHFA(24:5)	C38H64O4	584.481	19.28	3	LC-QTOF-MS	ESI-	3	[M-H]-	8.28411	6.6586e-08	2.1371	G2 - G1; G3 - G1; G4 - G1; G3 - G2; G4 - G2
Hydroxyandrosta-dione	C19H24O3	300.173	8.52	7	LC-QTOF-MS	ESI-	4	[2M-H]-	3.71669	4.1658e-07	2.0959	G3 - G1; G4 - G1; G3 - G2; G4 - G2; G4 - G3
PG(25:0)	C31H61O10P	624.4	21.91	4	LC-QTOF-MS	ESI-	4	[M-H-H2O]-	12.5264	9.1521e-05	1.904	G3 - G1; G4 - G1; G3 - G2; G4 - G2
FAHFA(37:5)	C37H62O4	570.465	22.16	2	LC-QTOF-MS	ESI-	4	[M+Cl]-	4.89474	4.87e-09	2.1289	G3 - G1; G4 - G1; G3 - G2; G4 - G2; G4 - G3
PG(27:1)	C33H63O10P	650.416	22.06	7	LC-QTOF-MS	ESI-	4	[M-H-H2O]-	17.995	0.00010394	1.8432	G3 - G1; G4 - G1; G3 - G2; G4 - G2; G4 - G3
CE(7:3)	C43H70O3	634.533	20.87	9	LC-QTOF-MS	ESI-	4	[M-H]-	18.4989	4.3149e-06	2.0383	G2 - G1; G3 - G1; G4 - G1; G3 - G2; G4 - G2; G4 - G3
DG(40:8)	C43H72O3	636.548	21.32	6	LC-QTOF-MS	ESI-	3	[M-H]-	14.8886	0.0022035	1.5981	G3 - G1; G4 - G1; G3 - G2; G4 - G2
PA(32:3)	C35H63O8P	642.426	22.17	1	LC-QTOF-MS	ESI-	4	[M-H]-	10.5161	2.8744e-08	2.1338	G3 - G1; G4 - G1; G3 - G2; G4 - G2; G4 - G3
PA(14:1)	C37H61O8P	664.41	17.38	2	LC-QTOF-MS	ESI-	3	[M-H-H2O]-	13.9126	1.8035e-05	1.772	G4 - G1; G4 - G2; G4 - G3
PI(19:1)	C28H53O12P	612.327	6.41	6	LC-QTOF-MS	ESI-	3	[M+HCOOH-H]-	7.03048	8.7941e-05	1.8823	G3 - G1; G4 - G1; G4 - G2; G4 - G3
CE (Cholesteryl Ester)	C45H74O3	662.564	21.4	4	LC-QTOF-MS	ESI-	3	[M-H]-	6.86009	0.0021689	1.5518	G3 - G1; G4 - G1; G3 - G2
FAHFA(24:6)	C44H74O4	666.559	20.88	3	LC-QTOF-MS	ESI-	3	[M-H]-	8.075	0.0094086	1.4168	G3 - G1; G4 - G1
PE(18:1)	C37H70NO8P	687.484	18.06	3	LC-QTOF-MS	ESI-	3	[M-H-H2O]-	8.9384	6.8734e-05	1.736	G2 - G1; G3 - G1; G4 - G1
LPS(27:2)	C33H64NO9P	649.432	10.37	8	LC-QTOF-MS	ESI-	4	[M+Cl]-	4.61485	0.0042941	1.5062	G3 - G1; G4 - G1; G3 - G2
PC(25:1)	C33H64NO9P	649.432	10.37	8	LC-QTOF-MS	ESI-	4	[M+Cl]-	4.61485	0.0042941	1.5062	G3 - G1; G4 - G1; G3 - G2
PC(26:3)	C34H62NO11P	691.406	9.35	2	LC-QTOF-MS	ESI-	3	[M-H]-	1.94989	7.788e-05	1.831	G2 - G1; G3 - G1; G4 - G1; G3 - G2; G4 - G2
PG(20:4)	C40H69O10P	740.463	20.94	7	LC-QTOF-MS	ESI-	3	[M-H-H2O]-	15.5338	0.0068127	1.3479	G3 - G1; G4 - G1
PS(32:5)	C38H64NO10P	725.427	9.4	10	LC-QTOF-MS	ESI-	4	M-H	3.61269	0.0099618	1.5213	G4 - G1; G4 - G2
PS(18:1)	C39H74NO10P	747.505	22.28	3	LC-QTOF-MS	ESI-	3	[M-H-H2O]-	17.109	1.1271e-11	2.0119	G1 - G2; G1 - G3; G1 - G4; G2 - G3; G2 - G4
UDP-N-acetylmuramyl-L-Ala	C23H36N4O20P2	750.14	1.15	2	LC-QTOF-MS	ESI-	3	[M-H]-	8.57366	0.0026304	1.4064	G1 - G2; G1 - G3; G1 - G4
PA(38:6)	C41H69O8P	720.473	20.76	6	LC-QTOF-MS	ESI-	3	[M+Cl]-	6.59641	4.6937e-08	2.0473	G3 - G1; G4 - G1; G3 - G2; G4 - G2; G4 - G3
PA(41:7)	C44H73O8P	760.504	21.85	5	LC-QTOF-MS	ESI-	3	[M-H]-	11.0564	0.0005014	1.7067	G2 - G1; G3 - G1; G4 - G1
PG(35:1)	C41H79O10P	762.541	22.82	7	LC-QTOF-MS	ESI-	3	[M-H]-	8.45846	2.5996e-06	2.038	G3 - G1; G4 - G1; G3 - G2; G4 - G2
PE(34:1) / PC(31:1) / PS(34:0)	C39H76NO8P/C40H78NO10P	717.531	22.82	5	LC-QTOF-MS	ESI-	4	[M+HCOOH-H]-/ [M-H]-	8.24984	1.4465e-05	1.9733	G3 - G1; G4 - G1; G3 - G2; G4 - G2
PG(35:0) / PA(37:0)	C41H81O10P/C40H79O8P	764.557	22.83	9	LC-QTOF-MS	ESI-	4	[M-H]- /[M+HCOOH-H]-	8.06804	0.00024064	1.7879	G3 - G1; G4 - G1; G4 - G2; G4 - G3
PG(36:6)	C42H71O10P	766.479	20.75	3	LC-QTOF-MS	ESI-	3	[M-H]-	11.2821	8.5545e-08	2.072	G3 - G1; G4 - G1; G3 - G2; G4 - G2; G4 - G3
PA(40:7)	C43H71O8P	746.489	21.08	1	LC-QTOF-MS	ESI-	3	[M+Cl]-	16.5474	7.5291e-05	1.8894	G3 - G1; G4 - G1; G4 - G2; G4 - G3
PA(40:6)	C43H73O8P	748.504	21.96	6	LC-QTOF-MS	ESI-	3	[M+Cl]-	6.42897	6.4442e-11	2.2056	G3 - G1; G4 - G1; G3 - G2; G4 - G2; G4 - G3
PG(38:6)	C44H75O10P	794.51	21.96	5	LC-QTOF-MS	ESI-	3	[M-H]-	7.02311	8.334e-09	2.1128	G3 - G1; G4 - G1; G3 - G2; G4 - G2; G4 - G3
PA(44:2)	C47H89O8P	812.63	15.15	4	LC-QTOF-MS	ESI-	3	[M-H-H2O]-	4.27328	2.3105e-05	1.9422	G3 - G1; G4 - G1; G4 - G2; G4 - G3
PA(41:6)	C44H75O8P	762.52	22.57	4	LC-QTOF-MS	ESI-	4	[M+Cl]-	17.7561	1.2796e-09	2.133	G3 - G1; G4 - G1; G3 - G2; G4 - G2; G4 - G3
PS(38:7) / PE(38:8)	C44H72NO10P/C43H70NO8P	805.489	17.19	6	LC-QTOF-MS	ESI-	4	[M-H]- /[M+HCOOH-H]-	19.3394	8.2606e-06	1.8065	G1 - G2; G1 - G3; G1 - G4
Acetyl-CoA	C23H38N7O17P3S	809.126	0.68	0	LC-QTOF-MS	ESI-	3	[M-H]-	8.98776	#N/A	0.6252	#N/A
PE(39:7) / PC(36:7)	C44H74NO8P	775.515	21.96	4	LC-QTOF-MS	ESI-	4	[M+Cl]-	6.01108	5.8683e-10	2.1321	G3 - G1; G4 - G1; G3 - G2; G4 - G2; G4 - G3
PI(34:4) / PG(36:6)	C43H75O13P/C42H71O10P	830.4945 / 766.4785	22.22	10	LC-QTOF-MS	ESI-	4	[M-H-H2O]-/[M+HCOOH-H]-	7.54286	9.182e-05	1.8935	G3 - G1; G4 - G1; G3 - G2; G4 - G2
PS(40:8)	C46H74NO10P	831.505	22.28	1	LC-QTOF-MS	ESI-	4	[M-H-H2O]-	10.4402	6.8974e-05	1.9056	G2 - G1; G3 - G1; G4 - G1; G3 - G2; G4 - G2
PG(40:7)	C46H77O10P	820.525	22.24	6	LC-QTOF-MS	ESI-	3	[M-H]-	5.70697	1.5845e-05	1.9781	G2 - G1; G3 - G1; G4 - G1; G3 - G2; G4 - G2
PC(37:7) / PE(40:7)	C45H76NO8P	789.531	22.81	5	LC-QTOF-MS	ESI-	4	[M+Cl]-	5.78296	5.6636e-06	2.0014	G3 - G1; G4 - G1; G3 - G2; G4 - G2; G4 - G3
PI(31:3)	C40H71O13P	790.463	7.43	6	LC-QTOF-MS	ESI-	4	[M+Cl]-	2.08331	2.4977e-06	2.0359	G3 - G1; G4 - G1; G3 - G2; G4 - G2; G4 - G3
PS(40:7)	C46H76NO10P	833.521	21.97	6	LC-QTOF-MS	ESI-	3	[M-H]-	7.39757	3.7544e-07	2.0268	G3 - G1; G4 - G1; G3 - G2; G4 - G2; G4 - G3
PGP(36:2)	C42H80O13P2	854.507	17.42	6	LC-QTOF-MS	ESI-	3	[M-H-H2O]-	16.3947	0.0064977	1.271	G1 - G2; G1 - G3; G1 - G4
PE(40:8) / PC(38:8)	C46H76NO8P	801.531	22.21	5	LC-QTOF-MS	ESI-	4	[M+Cl]-	13.0413	7.9434e-05	1.8938	G2 - G1; G3 - G1; G4 - G1; G3 - G2; G4 - G2
PS(38:8)	C44H70NO10P	803.474	9.99	2	LC-QTOF-MS	ESI-	3	[M+HCOOH-H]-	3.02873	0.0016559	1.6901	G3 - G1; G4 - G1; G3 - G2; G4 - G2
PGP(38:5)	C39H68O16P2	854.905	7.6	0	LC-QTOF-MS	ESI-	3	[M-H]-	2.44213	0.010471	1.2911	G2 - G1; G3 - G1; G4 - G1
PS(44:12)	C50H74NO10P	879.505	16.23	3	LC-QTOF-MS	ESI-	3	[M-H-H2O]-	6.75844	1.1271e-07	2.0888	G3 - G1; G4 - G1; G3 - G2; G4 - G2; G4 - G3
PI(40:8)	C49H79O13P	906.526	5.86	6	LC-QTOF-MS	ESI-	3	[M-H-H2O]-	4.4998	2.0815e-05	1.7647	G2 - G1; G3 - G1; G4 - G1
Hydroxyoxocyclohexane-carbonyl-CoA	C28H44N7O19P3S	907.163	7.77	10	LC-QTOF-MS	ESI-	4	[M-H-H2O]-	13.0125	1.1051e-05	1.9395	G3 - G1; G4 - G1; G4 - G2; G4 - G3
PI(32:1)	C47H87O18P	970.563	16.43	5	LC-QTOF-MS	ESI-	3	[M-H-H2O]-	7.25188	6.5438e-12	2.001	G2 - G1; G3 - G1; G4 - G1; G4 - G2; G4 - G3
PI(34:1)	C49H91O18P	998.594	17.2	5	LC-QTOF-MS	ESI-	3	[M-H-H2O]-	11.6746	3.4108e-07	1.8829	G1 - G2; G1 - G3; G1 - G4
PI(36:1)	C51H95O18P	1026.63	17.8	5	LC-QTOF-MS	ESI-	4	[M-H-H2O]-	5.25861	2.8921e-10	2.215	G2 - G1; G3 - G1; G4 - G1; G3 - G2; G4 - G2; G4 - G3
PI(34:2)	C49H89O18P	996.579	6.03	7	LC-QTOF-MS	ESI-	4	[M+Cl]-	5.49444	5.8993e-07	2.1005	G2 - G1; G3 - G1; G4 - G1; G3 - G2; G4 - G2; G4 - G3
PI(34:2) / PIP(38:3)	C49H89O18P/C50H92O18P2	996.579	17.49	6	LC-QTOF-MS	ESI-	4	[M+HCOOH-H]-/ [M-H]-	11.6722	0.002167	1.3784	G1 - G2; G1 - G3; G1 - G4
PC(38:0)	C50H98NO18P	1031.65	9.26	3	LC-QTOF-MS	ESI-	4	[M+Cl]-	1.93186	0.0057134	1.5812	G3 - G1; G4 - G1
PI(36:2)	C51H93O18P	1024.61	18.15	7	LC-QTOF-MS	ESI-	4	[M+HCOOH-H]-	1.7949	4.3143e-05	1.9426	G2 - G1; G3 - G1; G4 - G1; G4 - G2
CDP-DG(40:3)	C52H91N3O15P2	1059.59	7.63	0	LC-QTOF-MS	ESI-	4	[M+Cl]-	2.21868	2.968e-08	2.1625	G2 - G1; G3 - G1; G4 - G1; G3 - G2; G4 - G2; G4 - G3
CL(40:0)	C53H102O17P2	1072.66	13.18	2	LC-QTOF-MS	ESI-	4	[M+HCOOH-H]-	2.9796	9.4538e-06	1.7179	G2 - G1; G3 - G1; G4 - G1
DG(34:4)	C37H64O5	588.475	20.27	2	LC-QTOF-MS	ESI-	4	[2M-H]-	10.0025	4.452e-07	2.0797	G3 - G1; G4 - G1; G3 - G2; G4 - G2; G4 - G3
CL(44:0)	C63H122O17P2	1212.82	17.5	2	LC-QTOF-MS	ESI-	4	[M+HCOOH-H]-	17.8585	0.0011822	1.4651	G1 - G2; G1 - G3; G1 - G4
PI(33:2)	C60H107O28P	1306.67	9.41	5	LC-QTOF-MS	ESI-	4	[M-H-H2O]-	3.82974	0.0008007	1.7663	G3 - G1; G4 - G1; G4 - G2
PA(35:3)	C38H71O7P	670.494	21.96	9	LC-QTOF-MS	ESI-	4	[2M-H]-	7.95735	1.3708e-08	2.0887	G3 - G1; G4 - G1; G3 - G2; G4 - G2; G4 - G3
PI(37:2)	C64H115O28P	1362.73	6.91	1	LC-QTOF-MS	ESI-	4	[M-H-H2O]-	6.19309	3.9409e-05	1.8771	G2 - G1; G3 - G1; G4 - G1; G4 - G2; G4 - G3
CL(66:2)	C75H142O17P2	1376.97	21.96	9	LC-QTOF-MS	ESI-	4	[M-H-H2O]-	9.33957	1.8646e-08	2.0841	G3 - G1; G4 - G1; G3 - G2; G4 - G2; G4 - G3
CL(65:2)	C74H140O17P2	1362.96	21.95	4	LC-QTOF-MS	ESI-	4	[M-H]-	10.0381	5.5328e-09	2.1414	G3 - G1; G4 - G1; G3 - G2; G4 - G2; G4 - G3
M(IP)(42:0)	C60H117NO26P2	1329.73	18.73	2	LC-QTOF-MS	ESI-	4	[M+Cl]-	8.46251	8.5889e-06	2.0026	G3 - G1; G4 - G1; G4 - G2; G4 - G3
CL(65:0)	C74H144O17P2	1366.99	22.29	3	LC-QTOF-MS	ESI-	4	[M-H]-	12.1007	0.0048488	1.6109	G3 - G1; G4 - G1; G4 - G2
CL(67:2)	C76H142O17P2	1389.9	22.29	3	LC-QTOF-MS	ESI-	4	[M-H-H2O]-	13.8287	0.0015312	1.6687	G2 - G1; G3 - G1; G4 - G1
PE(32:1) / CL(66:1)	C37H72NO8P/C75H144O17P2	689.5	22.82	9	LC-QTOF-MS	ESI-	4	[2M-H]-/ [M-H]-	12.584	1.033e-09	2.1879	G3 - G1; G4 - G1; G3 - G2; G4 - G2; G4 - G3
PG(30:0)	C36H71O10P	694.479	22.23	10	LC-QTOF-MS	ESI-	4	[2M-H]-	15.4262	7.6596e-06	2.0069	G2 - G1; G3 - G1; G4 - G1; G3 - G2; G4 - G2
Phosphoribosyl-ATP	C15H25N5O20P4	719.004	21.95	3	LC-QTOF-MS	ESI-	4	[2M-H]-	14.86	1.5688e-05	1.9693	G3 - G1; G4 - G1; G3 - G2; G4 - G2
LPI(19:1)	C58H103O37P	1422.59	4.23	6	LC-QTOF-MS	ESI-	4	[M+HCOOH-H]-	5.7056	0.0036361	1.6239	G3 - G1; G4 - G1; G4 - G2
CL(76:11) / PE(38:8)	C85H146O17P2/C44H72NO8P	1501.0035 / 773.4996	22.81	3	LC-QTOF-MS	ESI-	4	[M+HCOOH-H]-/ [2M-H]-	14.1131	2.3468e-05	1.9193	G3 - G1; G4 - G1; G3 - G2; G4 - G2
PI(33:0)	C72H131O38P	1634.81	10.14	5	LC-QTOF-MS	ESI-	4	[M-H-H2O]-	1.95748	0.0011868	1.6479	G2 - G1; G3 - G1; G4 - G1
PI(32:2)	C59H105O28P	1292.65	10.08	0	LC-QTOF-MS	ESI-	4	[2M-H]-	5.93041	5.257e-05	1.0243	G2 - G1; G3 - G1; G4 - G1
Erythrosephosphate	C4H9O7P	200.009	10.14	2	LC-QTOF-MS	ESI+	4	[M+H-H2O]+	5.37949	4.7737e-10	1.9494	G2 - G1; G3 - G1; G4 - G1; G3 - G2; G4 - G2; G4 - G3
Ketodeoxy-phosphogluconate	C6H11O9P	258.014	10.13	5	LC-QTOF-MS	ESI+	4	[M+H]+	9.90241	3.1421e-10	1.9462	G2 - G1; G3 - G1; G4 - G1; G3 - G2; G4 - G2; G4 - G3
Xylosephosphate	C5H11O8P	230.019	12.47	6	LC-QTOF-MS	ESI+	4	[M+H-H2O]+	3.07777	7.1166e-10	1.9163	G2 - G1; G3 - G1; G4 - G1; G3 - G2; G4 - G2; G4 - G3
Glucuronate-phosphate / Ascorbate-phosphate	C6H9O9P	274.009	0.62	8	LC-QTOF-MS	ESI+	3	[M+H-H2O]+	5.14529	4.9096e-09	1.8983	G2 - G1; G3 - G1; G4 - G1; G4 - G2; G4 - G3
PC(33:2) / PE(36:2)	C41H78NO8P	743.547	21.95	1	LC-QTOF-MS	ESI+	3	[M+H]+	4.58484	2.6391e-10	1.879	G3 - G1; G4 - G1; G3 - G2; G4 - G2; G4 - G3
PA(39:0)	C42H83O8P	746.583	21.96	3	LC-QTOF-MS	ESI+	4	[M+H-H2O]+	7.22732	5.2282e-09	1.8368	G3 - G1; G4 - G1; G3 - G2; G4 - G2; G4 - G3
Guaiacols	C7H8O2	124.052	9.24	2	LC-QTOF-MS	ESI+	4	[M+H]+	7.91138	1.2125e-08	1.831	G2 - G1; G3 - G1; G4 - G1; G4 - G2; G4 - G3
Oxalosuccinate	C6H6O7	190.011	12.56	10	LC-QTOF-MS	ESI+	4	[M+H]+	17.3728	4.1414e-08	1.8288	G3 - G1; G4 - G1; G3 - G2; G4 - G2; G4 - G3
LPE(18:1)	C23H46NO7P	479.301	17.19	4	LC-QTOF-MS	ESI+	2	[M+H]+	1.80561	1.6095e-10	1.8158	G1 - G2; G1 - G3; G1 - G4; G2 - G3; G2 - G4
Glucoheptonic acid	C7H14O8	226.069	13.58	2	LC-QTOF-MS	ESI+	4	[M+H]+	6.93543	2.5135e-07	1.8145	G2 - G1; G3 - G1; G4 - G1; G4 - G2; G4 - G3
Glutamine	C5H10N2O3	146.069	10.05	2	LC-QTOF-MS	ESI+	4	[M+K]+	13.3635	3.5168e-08	1.8139	G3 - G1; G4 - G1; G4 - G2; G4 - G3
Phosphoenolpyruvic acid	C3H5O6P	167.982	12.33	4	LC-QTOF-MS	ESI+	4	[M+NH4]+	19.0994	2.4898e-06	1.774	G3 - G1; G4 - G1; G3 - G2; G4 - G2; G4 - G3
Ascorbic acid	C6H8O6	176.032	12.44	1	LC-QTOF-MS	ESI+	4	[M+H]+	11.7265	9.0644e-07	1.755	G3 - G1; G4 - G1; G4 - G2; G4 - G3
Hydantoin propionic acid	C6H8N2O4	172.048	12.55	1	LC-QTOF-MS	ESI+	4	[M+H-H2O]+	16.772	1.8385e-06	1.7244	G3 - G1; G4 - G1; G4 - G2; G4 - G3
Guanine	C5H5N5O	151.049	1.79	4	LC-QTOF-MS	ESI+	2	[M+H]+	3.15634	1.8665e-05	1.7226	G1 - G2; G1 - G3; G1 - G4; G2 - G3; G2 - G4
Serine-phosphoethanolamine	C5H13N2O6P	228.051	0.64	10	LC-QTOF-MS	ESI+	4	[M+H]+	8.63789	1.2581e-05	1.7169	G2 - G1; G3 - G1; G4 - G1; G3 - G2; G4 - G2
Acetyl-citrulline	C8H15N3O4	217.106	3.3	3	LC-QTOF-MS	ESI+	3	[M+H]+	13.8623	2.0957e-05	1.7115	G3 - G1; G4 - G1; G3 - G2; G4 - G2; G4 - G3
Xylonolactone-phosphate	C5H9O8P	228.004	14.89	3	LC-QTOF-MS	ESI+	4	[M+H]+	10.4133	2.5811e-06	1.7019	G2 - G1; G3 - G1; G4 - G1; G4 - G2; G4 - G3
Guanosine	C10H13N5O5	283.092	1.79	2	LC-QTOF-MS	ESI+	3	[M+H]+	2.89334	2.1829e-05	1.6958	G1 - G3; G1 - G4; G2 - G3; G2 - G4
Hydroxytetrahydrobiopterin	C9H15N5O4	257.112	16.68	4	LC-QTOF-MS	ESI+	4	[M+H]+	17.6342	3.4955e-05	1.685	G2 - G1; G3 - G1; G4 - G1; G3 - G2; G4 - G2
Methylphosphate	CH5O4P	111.993	12.55	2	LC-QTOF-MS	ESI+	4	[M+NH4]+	18.061	4.4357e-05	1.6733	G3 - G1; G4 - G1; G3 - G2; G4 - G2; G4 - G3
Uracil	C4H4N2O2	112.027	1.15	5	LC-QTOF-MS	ESI+	3	[M+H]+	3.87609	1.8602e-05	1.6694	G1 - G2; G1 - G3; G1 - G4; G2 - G4
CDP-DG(34:2)	C46H81N3O15P2	977.514	8.07	1	LC-QTOF-MS	ESI+	4	[M+K]+	15.6883	2.5345e-06	1.6442	G2 - G1; G3 - G1; G4 - G1; G4 - G2
Propanoyl-CoA	C24H40N7O17P3S	823.141	8.73	4	LC-QTOF-MS	ESI+	4	[M+Na]+	3.76582	2.8637e-06	1.6373	G2 - G1; G3 - G1; G4 - G1; G4 - G2
Glycerophosphorylethanolamine	C5H14NO6P	215.056	17.19	3	LC-QTOF-MS	ESI+	3	[M+H]+	19.3975	2.839e-07	1.6311	G1 - G2; G1 - G3; G1 - G4
Pentadecadiene	C15H28	208.219	9.05	7	LC-QTOF-MS	ESI+	4	[M+2H]+	11.5463	3.0869e-06	1.6293	G2 - G1; G3 - G1; G4 - G1
UDP-acetylmuramoyl-alanyl-glutamyl-lysine	C34H55N7O24P2	1007.28	18.78	6	LC-QTOF-MS	ESI+	4	[M+H-H2O]+	9.19282	0.00018151	1.6139	G3 - G1; G4 - G1; G3 - G2; G4 - G2
dTDP-oxo-deoxy-allose	C16H24N2O15P2	546.065	0.63	7	LC-QTOF-MS	ESI+	4	[M+H]+	3.00781	3.1042e-07	1.6091	G2 - G1; G3 - G1; G4 - G1
Formylkynurenine	C11H12N2O4	236.08	0.65	5	LC-QTOF-MS	ESI+	3	[M+H-H2O]+	18.9633	0.00013459	1.5986	G2 - G1; G3 - G1; G4 - G1; G4 - G2; G4 - G3
Guanidinoacetic acid	C3H7N3O2	117.054	13.7	2	LC-QTOF-MS	ESI+	4	[M+K]+	16.7142	3.05e-05	1.591	G3 - G1; G4 - G1; G4 - G2; G4 - G3
Hydroxyoctanoyl-CoA	C29H50N7O18P3S	909.215	9.74	5	LC-QTOF-MS	ESI+	4	[M+Na]+	15.8282	0.00034873	1.5821	G2 - G1; G3 - G1; G4 - G1; G4 - G2
Uridine	C9H12N2O6	244.07	1.15	1	LC-QTOF-MS	ESI+	4	[M+H]+	9.33482	0.00014819	1.582	G1 - G2; G1 - G3; G1 - G4; G2 - G4
Xanthine	C5H4N4O2	152.033	0.69	3	LC-QTOF-MS	ESI+	2	[M+H]+	5.0961	0.00012182	1.5498	G2 - G1; G3 - G1; G4 - G1
Methylthioribose	C6H12O4S	180.046	6.73	10	LC-QTOF-MS	ESI+	4	[M+H]+	10.9748	3.2027e-05	1.5497	G4 - G1; G4 - G2; G4 - G3
Hydroxycitric acid	C6H8O8	208.022	10.41	3	LC-QTOF-MS	ESI+	3	[M+H]+	9.14698	7.1438e-05	1.5344	G2 - G1; G3 - G1; G4 - G1
Biotin amide	C10H17N3O2S	243.104	17.45	5	LC-QTOF-MS	ESI+	3	[M+H-H2O]+	1.68803	0.00077178	1.533	G3 - G1; G4 - G1; G4 - G2; G4 - G3
Tetrahydrodipicolinate	C7H9NO4	171.053	14.89	2	LC-QTOF-MS	ESI+	4	[M+Na]+	15.549	0.0002193	1.5257	G4 - G1; G4 - G2; G4 - G3
Ribose	C5H10O5	150.053	0.62	8	LC-QTOF-MS	ESI+	4	[M+Na]+	13.2412	0.00021534	1.5221	G2 - G1; G3 - G1; G4 - G1
Phenylalanine	C9H11NO2	165.079	8.48	4	LC-QTOF-MS	ESI+	2	[M+H]+	15.5434	0.00013902	1.5175	G2 - G1; G3 - G1; G4 - G1
Hydroxymalonate	C3H4O5	120.006	14.89	38	LC-QTOF-MS	ESI+	4	[M+NH4]+	13.7102	0.00028651	1.5145	G4 - G1; G4 - G2; G4 - G3
Glutamic acid	C5H9NO4	147.053	11.97	33	LC-QTOF-MS	ESI+	4	[M+Na]+	11.3463	0.00016781	1.513	G4 - G1; G4 - G2; G4 - G3
Urate	C5H4N4O3	168.028	11.97	7	LC-QTOF-MS	ESI+	4	[M+Na]+	6.12922	0.00015992	1.5066	G4 - G1; G4 - G2; G4 - G3
PG(37:7)	C43H71O10P	778.479	10.04	6	LC-QTOF-MS	ESI+	4	[M+Na]+	8.70147	0.00056832	1.5055	G2 - G1; G3 - G1; G4 - G1; G4 - G2
HIP-CoA	C34H52N7O19P3S	987.225	9.97	5	LC-QTOF-MS	ESI+	4	[M+NH4]+	19.6497	0.00044715	1.5053	G2 - G1; G3 - G1; G4 - G1; G4 - G2
Erythro-tetrahydrobiopterin	C9H15N5O3	241.118	17.46	8	LC-QTOF-MS	ESI+	3	[M+H]+	2.67457	0.0013836	1.5008	G3 - G1; G4 - G1; G4 - G2
Methionine	C5H11NO2S	149.051	17.46	3	LC-QTOF-MS	ESI+	4	[M+H]+	3.48412	0.0016249	1.4926	G3 - G1; G4 - G1; G4 - G2
Methylene-indolenine	C9H7N	129.058	14.9	3	LC-QTOF-MS	ESI+	3	[M+H]+	15.1718	0.00045875	1.4887	G4 - G1; G4 - G2; G4 - G3
Proline	C5H9NO2	115.063	10.15	4	LC-QTOF-MS	ESI+	4	[M+K]+	10.631	3.517e-05	1.4837	G2 - G1; G3 - G1; G4 - G1
Adenine	C5H5N5	135.054	1.55	4	LC-QTOF-MS	ESI+	2	[M+H]+	0.993818	0.00031078	1.4691	G1 - G2; G1 - G3; G1 - G4
Indole-carboxaldehyde	C9H7NO	145.053	9.82	6	LC-QTOF-MS	ESI+	2	[M+H]+	9.73376	5.141e-05	1.4514	G4 - G1; G4 - G2; G4 - G3
Phosphonoacetaldehyde	C2H5O4P	123.993	10.41	1	LC-QTOF-MS	ESI+	4	[M+NH4]+	10.5083	0.00089537	1.4352	G2 - G1; G3 - G1; G4 - G1
Glycyl-Methionine	C7H14N2O3S	206.072	17.12	6	LC-QTOF-MS	ESI+	4	[M+H]+	12.6008	0.0018693	1.4318	G2 - G1; G3 - G1; G4 - G1
Arabitol	C5H12O5	152.069	11.97	7	LC-QTOF-MS	ESI+	4	[M+H]+	5.69801	0.00028851	1.4223	G4 - G1; G4 - G2; G4 - G3
Hydroxy-oxoglutaric acid	C5H6O6	162.016	12.86	5	LC-QTOF-MS	ESI+	4	[M+H-H2O]+	11.9587	0.0047603	1.4077	G3 - G1; G4 - G1; G4 - G2
PE(32:0) / PA(34:1)	C37H74NO8P/C37H71O8P	691.515	21	1	LC-QTOF-MS	ESI+	4	[M+H]+/ [M+NH4]+	15.5617	1.164e-05	1.4046	G1 - G2; G1 - G3; G1 - G4
Adenosyl-homocysteine	C14H20N6O5S	384.122	0.65	9	LC-QTOF-MS	ESI+	4	[M+H]+	6.28433	0.0050795	1.4009	G3 - G1; G4 - G1; G4 - G2
CDP-DG(26:0)	C38H69N3O15P2	869.42	19.97	1	LC-QTOF-MS	ESI+	4	[M+Na]+	4.70072	0.00069859	1.3988	G4 - G1; G4 - G2; G4 - G3
Hydroxymethylbutyl-CoA	C26H46N7O17P3S	853.188	9.68	1	LC-QTOF-MS	ESI+	4	[M+Na]+	15.7237	0.0047234	1.3967	G3 - G1; G4 - G1; G4 - G2
Shikimate	C7H10O5	174.053	14.68	8	LC-QTOF-MS	ESI+	4	[M+H-H2O]+	19.9197	0.00038738	1.3891	G4 - G1; G4 - G2; G4 - G3
Hydroxymethylpyrimidine	C6H9N3O	139.075	14.67	5	LC-QTOF-MS	ESI+	4	[M+H]+	7.45245	0.0007018	1.3816	G4 - G1; G4 - G2; G4 - G3
Methylpyridine	C6H7N	93.0578	12.86	6	LC-QTOF-MS	ESI+	3	[M+H]+	15.8187	0.0069994	1.3759	G3 - G1; G4 - G1; G4 - G2
Maltohexaose	C36H62O31	990.327	0.65	1	LC-QTOF-MS	ESI+	4	[M+H]+	1.90075	0.0019198	1.3739	G1 - G2; G1 - G3; G1 - G4
Oxo-Octenal	C8H12O2	140.084	18.06	8	LC-QTOF-MS	ESI+	3	[M+H]+	17.6425	0.0049423	1.3737	G1 - G3; G1 - G4; G2 - G3; G2 - G4
Methionine sulfoxide	C5H11NO3S	165.046	17.46	8	LC-QTOF-MS	ESI+	4	[M+H]+	1.19488	0.0061457	1.3669	G3 - G1; G4 - G1; G4 - G2
Aminopentanoic acid	C5H11NO2	117.079	0.65	6	LC-QTOF-MS	ESI+	2	[M+H]+	2.34467	0.000711	1.3654	G1 - G2; G1 - G3; G1 - G4
Pteroyltriglutamic acid	C29H33N9O12	699.225	4.91	1	LC-QTOF-MS	ESI+	3	[M+H]+	17.4349	0.0079171	1.3608	G1 - G3; G1 - G4; G2 - G4
Arabinonate	C5H10O6	166.048	13.07	3	LC-QTOF-MS	ESI+	4	[M+Na]+	9.71004	0.0051523	1.3556	G2 - G1; G3 - G1; G4 - G1
Hydroxyoxosuccinate	C4H4O6	148.001	13.69	5	LC-QTOF-MS	ESI+	4	[M+H-H2O]+	9.29786	0.0051496	1.3536	G3 - G1; G4 - G1; G4 - G2
Methylanthranilic acid	C8H9NO2	151.063	1.04	2	LC-QTOF-MS	ESI+	3	[M+H-H2O]+	16.2596	0.00025218	1.3479	G2 - G1; G3 - G1; G4 - G1
Indoleacetamide	C10H10N2O	174.079	20.52	9	LC-QTOF-MS	ESI+	4	[M+H]+	18.8119	0.0015368	1.3269	G4 - G1; G4 - G2; G4 - G3
PGP(36:3)	C42H78O13P2	852.492	9.68	0	LC-QTOF-MS	ESI+	4	[M+H]+	16.1723	0.0098417	1.306	G3 - G1; G4 - G1
Adenosine	C10H13N5O4	267.097	0.68	4	LC-QTOF-MS	ESI+	2	[M+H]+	1.86385	0.0058095	1.294	G1 - G2; G1 - G3; G1 - G4
Butanoyl-CoA	C25H42N7O17P3S	837.157	9.49	5	LC-QTOF-MS	ESI+	4	[M+Na]+	17.9959	0.016097	1.286	G3 - G1; G4 - G1; G4 - G2
Deoxyadenosine	C10H13N5O3	251.102	1.67	4	LC-QTOF-MS	ESI+	3	[M+H]+	15.4104	0.0010185	1.2858	G1 - G2; G1 - G3; G1 - G4
CDP-glycerol	C52H85N3O13P2	1021.56	21.24	4	LC-QTOF-MS	ESI+	4	[M+H-H2O]+	15.1117	0.013255	1.2661	G1 - G3; G1 - G4; G2 - G4
Sulfoacetyl-CoA	C23H38N7O20P3S2	889.083	10.13	8	LC-QTOF-MS	ESI+	4	[M+NH4]+	13.0958	0.005575	1.2652	G2 - G1; G3 - G1; G4 - G1
Mannitol	C6H14O6	182.079	13.85	2	LC-QTOF-MS	ESI+	4	[M+H]+	16.9852	0.0033177	1.2595	G2 - G1; G3 - G1; G4 - G1
PS(26:0)	C32H62NO10P	651.411	9.36	2	LC-QTOF-MS	ESI+	4	[M+Na]+	5.89993	0.01269	1.2256	G3 - G1; G4 - G1
Deoxyinosine	C10H12N4O4	252.086	7.43	2	LC-QTOF-MS	ESI+	4	[M+H]+	18.3105	0.002341	1.2175	G2 - G1; G3 - G1; G4 - G1; G4 - G3
Pyridoxal	C8H9NO3	167.058	2.43	4	LC-QTOF-MS	ESI+	3	[M+H]+	7.77024	0.0010085	1.2115	G1 - G2; G1 - G3; G1 - G4
Sedoheptulose-phosphate	C7H13O10P	288.026	0.63	4	LC-QTOF-MS	ESI+	4	[M+H]+	16.1947	0.0027612	1.2058	G1 - G2; G1 - G3; G1 - G4
Glutaryl-CoA	C26H42N7O19P3S	881.147	9.08	1	LC-QTOF-MS	ESI+	4	[M+H-H2O]+	7.40726	0.001753	1.1994	G2 - G1; G3 - G1; G4 - G1
Hypoxanthine	C5H4N4O	136.038	0.67	5	LC-QTOF-MS	ESI+	2	[M+H]+	1.73059	0.00018346	1.1959	G2 - G1; G3 - G1; G4 - G1
Methylthioadenosine	C11H15N5O3S	297.09	4.13	3	LC-QTOF-MS	ESI+	2	[M+H]+	2.45098	0.0051377	1.1831	G1 - G2; G1 - G3; G1 - G4
FOH(10:6)	C10H10O	146.073	17.62	5	LC-QTOF-MS	ESI+	3	[M+H]+	2.67029	0.0011063	1.1602	G2 - G1; G3 - G1; G4 - G1
Phaselate	C13H12O8	296.053	11.34	5	LC-QTOF-MS	ESI+	4	[M+H]+	16.1828	0.014419	1.1423	G2 - G1; G3 - G1; G4 - G1
Amino-uracil	C9H16N4O6	276.107	4.13	8	LC-QTOF-MS	ESI+	4	[M+H]+	4.87453	0.0017286	1.0952	G1 - G2; G1 - G3; G1 - G4
PLA (picolinic acid)	C6H5NO2	123.032	0.88	3	LC-QTOF-MS	ESI+	3	[M+H-H2O]+	4.34701	0.017226	1.0111	G2 - G1; G3 - G1; G4 - G1
UDP (uridine diphosphate) acetylglucosamine	C17H25N3O17P2	605.067	12.62	1	LC-QTOF-MS	ESI+	4	[M+H]+	12.9007	4.3879e-06	1.0068	G2 - G1; G3 - G1; G4 - G1
Hydroxypropionyl-CoA	C24H40N7O18P3S	839.136	9.09	3	LC-QTOF-MS	ESI+	4	[M+Na]+	18.8538	0.0048215	1.0063	G2 - G1; G3 - G1; G4 - G1

## Sheet: Database-cleaned Metabolites
Compound Name	Molecular Formula	Molecular Weight	RT (min)	mz Error (ppm)	Analytical platform	DET	ID Level	Adduct	CVQC	PVALOR	VIP	Fisher's LSD
Nicotinamide	C6H6N2O	122.13	12.638	-	GC-QTOF-MS	EI	2	-	26.2795	0.00019331	1.5669	G2 - G1; G3 - G1; G4 - G1; G4 - G2; G4 - G3
Octanedioic acid	C8H12O4	172.18	15.194	-	GC-QTOF-MS	EI	2	-	17.0101	0.0092453	1.2498	G1 - G4; G2 - G3; G2 - G4
Tagatose/Fructose/Sorbose	C6H12O6	180.16	16.706	-	GC-QTOF-MS	EI	2	-	14.1423	7.7813e-06	1.7278	G2 - G1; G3 - G1; G4 - G1; G4 - G2; G4 - G3
Heptanedioic acid	C7H10O4	158.15	14.009	-	GC-QTOF-MS	EI	2	-	12.5255	2.7862e-06	1.7736	G3 - G1; G4 - G1; G3 - G2; G4 - G2; G4 - G3
Glucopyranuronate	C6H9O7	193.13	17.333	-	GC-QTOF-MS	EI	2	-	10.203	4.6381e-08	1.8626	G2 - G1; G3 - G1; G4 - G1; G3 - G2; G4 - G2; G4 - G3
Cytidine	C9H13N3O5	243.22	22.401	-	GC-QTOF-MS	EI	2	-	9.74318	4.9406e-05	1.6822	G2 - G1; G3 - G1; G4 - G1; G3 - G2; G4 - G2
Glutamate	C5H8NO4	146.12	13.271	-	GC-QTOF-MS	EI	2	-	9.73768	0.0058825	1.0894	G2 - G1; G3 - G1; G4 - G1
Alanine	C3H7NO2	89.094	7.452	-	GC-QTOF-MS	EI	2	-	8.81223	0.0089725	0.94779	G2 - G1; G3 - G1; G4 - G1
Acetyl-glutamate	C7H9NO5	187.15	12.833	-	GC-QTOF-MS	EI	2	-	8.5741	0.0024134	1.2013	G2 - G1; G3 - G1; G4 - G1
Malic acid	C4H4O5	132.07	12.575	-	GC-QTOF-MS	EI	2	-	7.9052	0.013409	0.91968	G2 - G1; G3 - G1; G4 - G1
Ribitol/Xylitol/Arabitol	C5H12O5	152.15	15.2	-	GC-QTOF-MS	EI	2	-	7.84934	0.012733	0.85215	G1 - G2; G1 - G3; G1 - G4
FA(20:3)	C20H34O2	306.48	21.72	-	GC-QTOF-MS	EI	2	-	7.61023	8.2276e-08	1.815	G2 - G1; G3 - G1; G4 - G1; G4 - G2; G4 - G3
Dodecanoic acid	C12H23O2	199.31	14.62	-	GC-QTOF-MS	EI	2	-	6.6689	0.009032	1.1034	G1 - G4; G2 - G3; G2 - G4
Galactonate	C6H11O7	195.15	18.197	-	GC-QTOF-MS	EI	2	-	5.50494	0.0034461	1.449	G3 - G1; G4 - G1; G4 - G2
Decanoic acid	C10H19O2	171.26	12.301	-	GC-QTOF-MS	EI	2	-	5.27042	2.0594e-08	1.8913	G2 - G1; G3 - G1; G4 - G1; G3 - G2; G4 - G2; G4 - G3
Oxo-ureidopropanoate	C4H5N2O4	145.09	11.827	-	GC-QTOF-MS	EI	2	-	5.0057	0.0027881	1.1553	G2 - G1; G3 - G1; G4 - G1
Homoserine	C4H9NO3	119.12	11.067	-	GC-QTOF-MS	EI	2	-	4.98206	5.4751e-08	1.8681	G2 - G1; G3 - G1; G4 - G1; G4 - G2; G4 - G3
Isoleucine	C6H13NO2	131.17	8.513	-	GC-QTOF-MS	EI	2	-	4.03493	0.00032559	1.5915	G2 - G1; G3 - G1; G4 - G1; G4 - G2
Hexanoic acid	C6H11O2	115.15	6.942	-	GC-QTOF-MS	EI	2	-	3.70043	4.2708e-06	1.7367	G1 - G2; G1 - G3; G1 - G4; G2 - G4; G3 - G4
Sylvic acid	C20H29O2	301.45	22.143	-	GC-QTOF-MS	EI	2	-	3.33871	6.6041e-08	1.8563	G2 - G1; G3 - G1; G4 - G1; G4 - G2; G4 - G3
Oleic acid	C18H34O2	282.256	17.49	5	LC-QTOF-MS	ESI-	2	[M-H]-	1.58819	0.0022717	1.4218	G1 - G2; G1 - G3; G1 - G4
Hexadecanoic acid	C16H32O2	256.24	21.01	1	LC-QTOF-MS	ESI-	2	[M-H]-	7.79187	3.5832e-07	1.9863	G1 - G2; G1 - G3; G1 - G4; G2 - G4
Linoleic acid	C18H32O2	280.24	20.43	5	LC-QTOF-MS	ESI-	2	[M-H]-	1.81716	0.0040453	1.6246	G1 - G3; G1 - G4; G2 - G4
Pentadecenal	C15H28O	224.214	18.13	3	LC-QTOF-MS	ESI-	3	[M+HCOOH-H]-	3.47948	0.00012958	1.801	G3 - G1; G4 - G1; G4 - G2; G4 - G3
Acetylornithine	C7H14N2O3	174.1	15.15	2	LC-QTOF-MS	ESI-	3	[M-H]-	3.3134	2.319e-05	1.9493	G3 - G1; G4 - G1; G4 - G2; G4 - G3
Hydroxymyristate	C14H28O3	244.204	20.43	0	LC-QTOF-MS	ESI-	3	[M-H]-	8.33908	1.4515e-06	1.8595	G4 - G1; G4 - G2; G4 - G3
Ornithine	C5H12N2O2	132.09	15.15	2	LC-QTOF-MS	ESI-	3	[M-H]-	2.21268	2.3989e-05	1.9476	G3 - G1; G4 - G1; G4 - G2; G4 - G3
Shikimate-phosphate	C7H11O8P	254.019	0.61	8	LC-QTOF-MS	ESI-	4	[M-H]-	3.04259	5.0398e-07	2.0636	G2 - G1; G3 - G1; G4 - G1; G4 - G2; G4 - G3
Gluconic acid	C6H12O7	196.058	0.66	2	LC-QTOF-MS	ESI-	2	[M-H]-	6.33406	1.6714e-08	2.1663	G2 - G1; G3 - G1; G4 - G1; G4 - G2; G4 - G3
Heptadecenoate	C17H32O2	268.24	16.54	4	LC-QTOF-MS	ESI-	3	[M-H]-	4.01097	0.0083044	1.2662	G2 - G1; G3 - G1; G4 - G1
Oxomyristate	C14H26O3	242.188	16.31	1	LC-QTOF-MS	ESI-	3	[M-H]-	5.90017	0.0012534	1.293	G2 - G1; G3 - G1; G4 - G1
Pyrrolnitrin	C10H6Cl2N2O2	255.981	15.68	0	LC-QTOF-MS	ESI-	2	[M-H]-	3.88397	2.5267e-06	2.0521	G2 - G1; G3 - G1; G4 - G1; G4 - G2; G4 - G3
Adenosylmethioninamine	C14H23N6O3S	355.436	19.92	8	LC-QTOF-MS	ESI-	4	[M-H]-	8.61084	0.00011619	1.5768	G1 - G2; G1 - G3; G1 - G4
CDP	C9H15N3O11P2	403.177	17.46	18	LC-QTOF-MS	ESI-	4	[M-H-H2O]-	4.34366	3.3025e-08	2.1567	G2 - G1; G3 - G1; G4 - G1; G3 - G2; G4 - G2; G4 - G3
Deoxycytidine-diphosphate	C9H15N3O10P2	387.177	18.4	15	LC-QTOF-MS	ESI-	4	[M-H]-	13.4698	6.9595e-07	2.0675	G3 - G1; G4 - G1; G3 - G2; G4 - G2; G4 - G3
Adenosine-monophosphate	C10H14N5O7P	347.063	17.44	4	LC-QTOF-MS	ESI-	4	[M+HCOOH-H]-	4.2113	4.2975e-07	2.0595	G2 - G1; G3 - G1; G4 - G1; G4 - G2; G4 - G3
Acetyl-hydroxylysine	C8H16N2O4	204.111	14	7	LC-QTOF-MS	ESI-	4	[2M-H]-	19.0472	2.3424e-06	1.8243	G1 - G2; G1 - G3; G1 - G4
Ribosylpyrimidine	C9H13N2O4	213.088	14.3	2	LC-QTOF-MS	ESI-	4	[2M-H]-	15.3337	6.5997e-07	1.8778	G1 - G2; G1 - G3; G1 - G4
Acetyl-CoA	C23H38N7O17P3S	809.126	0.68	0	LC-QTOF-MS	ESI-	3	[M-H]-	8.98776	#N/A	0.6252	#N/A
Hydroxyoxocyclohexane-carbonyl-CoA	C28H44N7O19P3S	907.163	7.77	10	LC-QTOF-MS	ESI-	4	[M-H-H2O]-	13.0125	1.1051e-05	1.9395	G3 - G1; G4 - G1; G4 - G2; G4 - G3
Phosphoribosyl-ATP	C15H25N5O20P4	719.004	21.95	3	LC-QTOF-MS	ESI-	4	[2M-H]-	14.86	1.5688e-05	1.9693	G3 - G1; G4 - G1; G3 - G2; G4 - G2
Erythrosephosphate	C4H9O7P	200.009	10.14	2	LC-QTOF-MS	ESI+	4	[M+H-H2O]+	5.37949	4.7737e-10	1.9494	G2 - G1; G3 - G1; G4 - G1; G3 - G2; G4 - G2; G4 - G3
Ketodeoxy-phosphogluconate	C6H11O9P	258.014	10.13	5	LC-QTOF-MS	ESI+	4	[M+H]+	9.90241	3.1421e-10	1.9462	G2 - G1; G3 - G1; G4 - G1; G3 - G2; G4 - G2; G4 - G3
Xylosephosphate	C5H11O8P	230.019	12.47	6	LC-QTOF-MS	ESI+	4	[M+H-H2O]+	3.07777	7.1166e-10	1.9163	G2 - G1; G3 - G1; G4 - G1; G3 - G2; G4 - G2; G4 - G3
Glucuronate-phosphate / Ascorbate-phosphate	C6H9O9P	274.009	0.62	8	LC-QTOF-MS	ESI+	3	[M+H-H2O]+	5.14529	4.9096e-09	1.8983	G2 - G1; G3 - G1; G4 - G1; G4 - G2; G4 - G3
Guaiacols	C7H8O2	124.052	9.24	2	LC-QTOF-MS	ESI+	4	[M+H]+	7.91138	1.2125e-08	1.831	G2 - G1; G3 - G1; G4 - G1; G4 - G2; G4 - G3
Oxalosuccinate	C6H6O7	190.011	12.56	10	LC-QTOF-MS	ESI+	4	[M+H]+	17.3728	4.1414e-08	1.8288	G3 - G1; G4 - G1; G3 - G2; G4 - G2; G4 - G3
LPE(18:1)	C23H46NO7P	479.301	17.19	4	LC-QTOF-MS	ESI+	2	[M+H]+	1.80561	1.6095e-10	1.8158	G1 - G2; G1 - G3; G1 - G4; G2 - G3; G2 - G4
Glutamine	C5H10N2O3	146.069	10.05 / 12.55	2	LC-QTOF-MS	ESI+	4	[M+K]+	13.3635	3.5168e-08	1.8139	G3 - G1; G4 - G1; G4 - G2; G4 - G3
Phosphoenolpyruvic acid	C3H5O6P	167.982	12.33	4	LC-QTOF-MS	ESI+	4	[M+NH4]+	19.0994	2.4898e-06	1.774	G3 - G1; G4 - G1; G3 - G2; G4 - G2; G4 - G3
Ascorbic acid	C6H8O6	176.032	12.44	1	LC-QTOF-MS	ESI+	4	[M+H]+	11.7265	9.0644e-07	1.755	G3 - G1; G4 - G1; G4 - G2; G4 - G3
Hydantoin propionic acid	C6H8N2O4	172.048	12.55	1	LC-QTOF-MS	ESI+	4	[M+H-H2O]+	16.772	1.8385e-06	1.7244	G3 - G1; G4 - G1; G4 - G2; G4 - G3
Guanine	C5H5N5O	151.049	1.79	4	LC-QTOF-MS	ESI+	2	[M+H]+	3.15634	1.8665e-05	1.7226	G1 - G2; G1 - G3; G1 - G4; G2 - G3; G2 - G4
Serine-phosphoethanolamine	C5H13N2O6P	228.051	0.64	10	LC-QTOF-MS	ESI+	4	[M+H]+	8.63789	1.2581e-05	1.7169	G2 - G1; G3 - G1; G4 - G1; G3 - G2; G4 - G2
Acetyl-citrulline	C8H15N3O4	217.106	3.3	3	LC-QTOF-MS	ESI+	3	[M+H]+	13.8623	2.0957e-05	1.7115	G3 - G1; G4 - G1; G3 - G2; G4 - G2; G4 - G3
Guanosine	C10H13N5O5	283.092	1.79	2	LC-QTOF-MS	ESI+	3	[M+H]+	2.89334	2.1829e-05	1.6958	G1 - G3; G1 - G4; G2 - G3; G2 - G4
Hydroxytetrahydrobiopterin	C9H15N5O4	257.112	10 / 16.16 / 16.68	4	LC-QTOF-MS	ESI+	4	[M+H]+	17.6342	3.4955e-05	1.685	G2 - G1; G3 - G1; G4 - G1; G3 - G2; G4 - G2
Methylphosphate	CH5O4P	111.993	12.55	2	LC-QTOF-MS	ESI+	4	[M+NH4]+	18.061	4.4357e-05	1.6733	G3 - G1; G4 - G1; G3 - G2; G4 - G2; G4 - G3
Uracil	C4H4N2O2	112.027	1.15	5	LC-QTOF-MS	ESI+	3	[M+H]+	3.87609	1.8602e-05	1.6694	G1 - G2; G1 - G3; G1 - G4; G2 - G4
Propanoyl-CoA	C24H40N7O17P3S	823.141	8.73	4	LC-QTOF-MS	ESI+	4	[M+Na]+	3.76582	2.8637e-06	1.6373	G2 - G1; G3 - G1; G4 - G1; G4 - G2
Glycerophosphorylethanolamine	C5H14NO6P	215.056	17.19	3	LC-QTOF-MS	ESI+	3	[M+H]+	19.3975	2.839e-07	1.6311	G1 - G2; G1 - G3; G1 - G4
dTDP-oxo-deoxy-allose	C16H24N2O15P2	546.065	0.63	7	LC-QTOF-MS	ESI+	4	[M+H]+	3.00781	3.1042e-07	1.6091	G2 - G1; G3 - G1; G4 - G1
Formylkynurenine	C11H12N2O4	236.08	0.65	5	LC-QTOF-MS	ESI+	3	[M+H-H2O]+	18.9633	0.00013459	1.5986	G2 - G1; G3 - G1; G4 - G1; G4 - G2; G4 - G3
Guanidinoacetic acid	C3H7N3O2	117.054	13.7 / 10.46	2	LC-QTOF-MS	ESI+	4	[M+K]+	16.7142	3.05e-05	1.591	G3 - G1; G4 - G1; G4 - G2; G4 - G3
Uridine	C9H12N2O6	244.07	1.15	1	LC-QTOF-MS	ESI+	4	[M+H]+	9.33482	0.00014819	1.582	G1 - G2; G1 - G3; G1 - G4; G2 - G4
Xanthine	C5H4N4O2	152.033	0.69	3	LC-QTOF-MS	ESI+	2	[M+H]+	5.0961	0.00012182	1.5498	G2 - G1; G3 - G1; G4 - G1
Methylthioribose	C6H12O4S	180.046	6.73	10	LC-QTOF-MS	ESI+	4	[M+H]+	10.9748	3.2027e-05	1.5497	G4 - G1; G4 - G2; G4 - G3
Biotin amide	C10H17N3O2S	243.104	17.45	5	LC-QTOF-MS	ESI+	3	[M+H-H2O]+	1.68803	0.00077178	1.533	G3 - G1; G4 - G1; G4 - G2; G4 - G3
Tetrahydrodipicolinate	C7H9NO4	171.053	14.89	2	LC-QTOF-MS	ESI+	4	[M+Na]+	15.549	0.0002193	1.5257	G4 - G1; G4 - G2; G4 - G3
Ribose	C5H10O5	150.053	0.62	8	LC-QTOF-MS	ESI+	4	[M+Na]+	13.2412	0.00021534	1.5221	G2 - G1; G3 - G1; G4 - G1
Phenylalanine	C9H11NO2	165.079	8.48	4	LC-QTOF-MS	ESI+	2	[M+H]+	15.5434	0.00013902	1.5175	G2 - G1; G3 - G1; G4 - G1
Hydroxymalonate	C3H4O5	120.006	14.89	38	LC-QTOF-MS	ESI+	4	[M+NH4]+	13.7102	0.00028651	1.5145	G4 - G1; G4 - G2; G4 - G3
Glutamic acid	C5H9NO4	147.053	11.97	33	LC-QTOF-MS	ESI+	4	[M+Na]+	11.3463	0.00016781	1.513	G4 - G1; G4 - G2; G4 - G3
Urate	C5H4N4O3	168.028	11.97	7	LC-QTOF-MS	ESI+	4	[M+Na]+	6.12922	0.00015992	1.5066	G4 - G1; G4 - G2; G4 - G3
HIP-CoA	C34H52N7O19P3S	987.225	9.97	5	LC-QTOF-MS	ESI+	4	[M+NH4]+	19.6497	0.00044715	1.5053	G2 - G1; G3 - G1; G4 - G1; G4 - G2
Erythro-tetrahydrobiopterin	C9H15N5O3	241.118	17.46	8	LC-QTOF-MS	ESI+	3	[M+H]+	2.67457	0.0013836	1.5008	G3 - G1; G4 - G1; G4 - G2
Methionine	C5H11NO2S	149.051	17.46	3	LC-QTOF-MS	ESI+	4	[M+H]+	3.48412	0.0016249	1.4926	G3 - G1; G4 - G1; G4 - G2
Proline	C5H9NO2	115.063	10.15	4	LC-QTOF-MS	ESI+	4	[M+K]+	10.631	3.517e-05	1.4837	G2 - G1; G3 - G1; G4 - G1
Adenine	C5H5N5	135.054	1.55	4	LC-QTOF-MS	ESI+	2	[M+H]+	0.993818	0.00031078	1.4691	G1 - G2; G1 - G3; G1 - G4
Indole-carboxaldehyde	C9H7NO	145.053	9.82	6	LC-QTOF-MS	ESI+	2	[M+H]+	9.73376	5.141e-05	1.4514	G4 - G1; G4 - G2; G4 - G3
Phosphonoacetaldehyde	C2H5O4P	123.993	10.41	1	LC-QTOF-MS	ESI+	4	[M+NH4]+	10.5083	0.00089537	1.4352	G2 - G1; G3 - G1; G4 - G1
Arabitol	C5H12O5	152.069	11.97	7	LC-QTOF-MS	ESI+	4	[M+H]+	5.69801	0.00028851	1.4223	G4 - G1; G4 - G2; G4 - G3
Hydroxy-oxoglutaric acid	C5H6O6	162.016	12.86	5	LC-QTOF-MS	ESI+	4	[M+H-H2O]+	11.9587	0.0047603	1.4077	G3 - G1; G4 - G1; G4 - G2
Adenosyl-homocysteine	C14H20N6O5S	384.122	0.65	9	LC-QTOF-MS	ESI+	4	[M+H]+	6.28433	0.0050795	1.4009	G3 - G1; G4 - G1; G4 - G2
Hydroxymethylbutyl-CoA	C26H46N7O17P3S	853.188	9.68	1	LC-QTOF-MS	ESI+	4	[M+Na]+	15.7237	0.0047234	1.3967	G3 - G1; G4 - G1; G4 - G2
Shikimate	C7H10O5	174.053	14.68	8	LC-QTOF-MS	ESI+	4	[M+H-H2O]+	19.9197	0.00038738	1.3891	G4 - G1; G4 - G2; G4 - G3
Hydroxymethylpyrimidine	C6H9N3O	139.075	14.67	5	LC-QTOF-MS	ESI+	4	[M+H]+	7.45245	0.0007018	1.3816	G4 - G1; G4 - G2; G4 - G3
Methylpyridine	C6H7N	93.0578	12.86	6	LC-QTOF-MS	ESI+	3	[M+H]+	15.8187	0.0069994	1.3759	G3 - G1; G4 - G1; G4 - G2
Maltohexaose	C36H62O31	990.327	0.65	1	LC-QTOF-MS	ESI+	4	[M+H]+	1.90075	0.0019198	1.3739	G1 - G2; G1 - G3; G1 - G4
Methionine sulfoxide	C5H11NO3S	165.046	17.46	8	LC-QTOF-MS	ESI+	4	[M+H]+	1.19488	0.0061457	1.3669	G3 - G1; G4 - G1; G4 - G2
Aminopentanoic acid	C5H11NO2	117.079	0.65	6	LC-QTOF-MS	ESI+	2	[M+H]+	2.34467	0.000711	1.3654	G1 - G2; G1 - G3; G1 - G4
Arabinonate	C5H10O6	166.048	13.07	3	LC-QTOF-MS	ESI+	4	[M+Na]+	9.71004	0.0051523	1.3556	G2 - G1; G3 - G1; G4 - G1
Hydroxyoxosuccinate	C4H4O6	148.001	10.46 / 13.69	5	LC-QTOF-MS	ESI+	4	[M+H-H2O]+	9.29786	0.0051496	1.3536	G3 - G1; G4 - G1; G4 - G2
Methylanthranilic acid	C8H9NO2	151.063	1.04	2	LC-QTOF-MS	ESI+	3	[M+H-H2O]+	16.2596	0.00025218	1.3479	G2 - G1; G3 - G1; G4 - G1
Indoleacetamide	C10H10N2O	174.079	20.52	9	LC-QTOF-MS	ESI+	4	[M+H]+	18.8119	0.0015368	1.3269	G4 - G1; G4 - G2; G4 - G3
Adenosine	C10H13N5O4	267.097	0.68	4	LC-QTOF-MS	ESI+	2	[M+H]+	1.86385	0.0058095	1.294	G1 - G2; G1 - G3; G1 - G4
Butanoyl-CoA	C25H42N7O17P3S	837.157	9.49	5	LC-QTOF-MS	ESI+	4	[M+Na]+	17.9959	0.016097	1.286	G3 - G1; G4 - G1; G4 - G2
Deoxyadenosine	C10H13N5O3	251.102	1.67	4	LC-QTOF-MS	ESI+	3	[M+H]+	15.4104	0.0010185	1.2858	G1 - G2; G1 - G3; G1 - G4
CDP-glycerol	C52H85N3O13P2	1021.56	21.24	4	LC-QTOF-MS	ESI+	4	[M+H-H2O]+	15.1117	0.013255	1.2661	G1 - G3; G1 - G4; G2 - G4
Mannitol	C6H14O6	182.079	13.85	2	LC-QTOF-MS	ESI+	4	[M+H]+	16.9852	0.0033177	1.2595	G2 - G1; G3 - G1; G4 - G1
Deoxyinosine	C10H12N4O4	252.086	12.58 / 7.43	2	LC-QTOF-MS	ESI+	4	[M+H]+	18.3105	0.002341	1.2175	G2 - G1; G3 - G1; G4 - G1; G4 - G3
Pyridoxal	C8H9NO3	167.058	2.43	4	LC-QTOF-MS	ESI+	3	[M+H]+	7.77024	0.0010085	1.2115	G1 - G2; G1 - G3; G1 - G4
Sedoheptulose-phosphate	C7H13O10P	288.026	0.63	4	LC-QTOF-MS	ESI+	4	[M+H]+	16.1947	0.0027612	1.2058	G1 - G2; G1 - G3; G1 - G4
Glutaryl-CoA	C26H42N7O19P3S	881.147	9.08	1	LC-QTOF-MS	ESI+	4	[M+H-H2O]+	7.40726	0.001753	1.1994	G2 - G1; G3 - G1; G4 - G1
Hypoxanthine	C5H4N4O	136.038	0.67	5	LC-QTOF-MS	ESI+	2	[M+H]+	1.73059	0.00018346	1.1959	G2 - G1; G3 - G1; G4 - G1
Methylthioadenosine	C11H15N5O3S	297.09	4.13	3	LC-QTOF-MS	ESI+	2	[M+H]+	2.45098	0.0051377	1.1831	G1 - G2; G1 - G3; G1 - G4
Phaselate	C13H12O8	296.053	11.34	5	LC-QTOF-MS	ESI+	4	[M+H]+	16.1828	0.014419	1.1423	G2 - G1; G3 - G1; G4 - G1
Amino-uracil	C9H16N4O6	276.107	2.44 / 4.13	8	LC-QTOF-MS	ESI+	4	[M+H]+	4.87453	0.0017286	1.0952	G1 - G2; G1 - G3; G1 - G4
PLA (picolinic acid)	C6H5NO2	123.032	0.88	3	LC-QTOF-MS	ESI+	3	[M+H-H2O]+	4.34701	0.017226	1.0111	G2 - G1; G3 - G1; G4 - G1
UDP (uridine diphosphate) acetylglucosamine	C17H25N3O17P2	605.067	12.62	1	LC-QTOF-MS	ESI+	4	[M+H]+	12.9007	4.3879e-06	1.0068	G2 - G1; G3 - G1; G4 - G1
Hydroxypropionyl-CoA	C24H40N7O18P3S	839.136	9.09	3	LC-QTOF-MS	ESI+	4	[M+Na]+	18.8538	0.0048215	1.0063	G2 - G1; G3 - G1; G4 - G1
